# Supplementary material for: Is a Four-Week Ketogenic Diet an Effective Nutritional Strategy in CrossFit-Trained Female and Male Athletes?
Source: MDPI journal article supplement (doi:10.3390/nu13030864), 2021-03-06
Supplement: s1 [file s1]

**Supplementary Table S2.** The Fight Gone Bad (FGB) test results.

| Indicator<br>Diet type            | Wall Ball Shots | Sumo Deadlift High<br>Pulls | Box jumps      | Press Push  | Rowing     | FGB <sub>Rounds total</sub> |
|-----------------------------------|-----------------|-----------------------------|----------------|-------------|------------|-----------------------------|
| <b>All</b>                        |                 |                             |                |             |            |                             |
| <b>Round 1</b>                    |                 |                             |                |             |            |                             |
| Customary diet                    | 26.3 ± 5.7      | 22.0 ± 4.9                  | 16.7 ± 3.2     | 17.3 ± 3.8  | 12.6 ± 1.7 | 94.9 ± 14.3                 |
| Ketogenic diet                    | 25.0 ± 5.4      | 22.5 ± 4.1                  | 17.5 ± 2.5     | 18.8 ± 5.1  | 12.9 ± 2.0 | 96.8 ± 14.3                 |
| <i>p</i>                          | 0.295**         | 0.508*                      | 0.145*         | 0.096*      | 0.214**    | 0.450*                      |
| <b>Round 2</b>                    |                 |                             |                |             |            |                             |
| Customary diet                    | 19.4 ± 4.6      | 18.0 ± 3.8                  | 14.9 ± 3.2     | 14.9 ± 4.5  | 11.5 ± 2.2 | 78.7 ± 14.4                 |
| Ketogenic diet                    | 19.7 ± 3.8      | 17.3 ± 1.9                  | 15.9 ± 2.9     | 16.1 ± 4.7  | 11.3 ± 1.8 | 80.3 ± 11.1                 |
| <i>p</i>                          | 0.530**         | 0.342*                      | <b>0.030*</b>  | 0.095*      | 0.452*     | 0.491*                      |
| <b>Round 3</b>                    |                 |                             |                |             |            |                             |
| Customary diet                    | 17.7 ± 5.0      | 15.9 ± 2.8                  | 14.4 ± 3.4     | 14.1 ± 4.8  | 11.6 ± 2.9 | 73.7 ± 15.7                 |
| Ketogenic diet                    | 16.7 ± 4.4      | 15.9 ± 3.0                  | 14.8 ± 3.0     | 14.5 ± 4.3  | 11.8 ± 2.2 | 73.7 ± 13.5                 |
| <i>p</i>                          | 0.175*          | 1.000*                      | 0.415**        | 0.565*      | 0.655*     | 1.000*                      |
| <b>Rounds 1–3<sub>total</sub></b> |                 |                             |                |             |            |                             |
| Customary diet                    | 63.4 ± 13.8     | 55.9 ± 9.5                  | 46.0 ± 9.0     | 46.3 ± 12.6 | 35.7 ± 5.8 | -                           |
| Ketogenic diet                    | 61.4 ± 12.4     | 55.7 ± 7.7                  | 48.2 ± 7.9     | 49.5 ± 13.6 | 36.0 ± 5.0 | -                           |
| <i>p</i>                          | 0.532**         | 0.875*                      | 0.070*         | 0.133*      | 0.807**    | -                           |
| <b>Females</b>                    |                 |                             |                |             |            |                             |
| <b>Round 1</b>                    |                 |                             |                |             |            |                             |
| Customary diet                    | 25.9 ± 6.8      | 22.5 ± 5.6                  | 16.9 ± 3.8     | 17.5 ± 4.0  | 11.8 ± 1.2 | 94.6 ± 16.7                 |
| Ketogenic diet                    | 24.9 ± 6.2      | 23.2 ± 4.8                  | 18.1 ± 2.8     | 19.6 ± 5.6  | 12.1 ± 1.5 | 97.9 ± 16.8                 |
| <i>p</i>                          | 0.575**         | 0.546*                      | 0.140*         | 0.054*      | 0.345**    | 0.329*                      |
| <b>Round 2</b>                    |                 |                             |                |             |            |                             |
| Customary diet                    | 18.7 ± 4.9      | 18.4 ± 3.7                  | 15.1 ± 3.5     | 15.6 ± 3.9  | 10.6 ± 1.6 | 78.4 ± 14.0                 |
| Ketogenic diet                    | 19.8 ± 4.5      | 17.6 ± 1.8                  | 16.6 ± 3.0     | 16.8 ± 4.9  | 10.6 ± 1.7 | 81.4 ± 12.2                 |
| <i>p</i>                          | 0.236**         | 0.423*                      | <b>0.022*</b>  | 0.066**     | 1.000*     | 0.184*                      |
| <b>Round 3</b>                    |                 |                             |                |             |            |                             |
| Customary diet                    | 17.1 ± 5.0      | 16.7 ± 2.3                  | 14.5 ± 3.4     | 15.0 ± 4.3  | 11.2 ± 1.8 | 74.5 ± 14.1                 |
| Ketogenic diet                    | 16.9 ± 5.2      | 16.8 ± 2.5                  | 15.7 ± 2.5     | 15.1 ± 4.4  | 11.7 ± 1.7 | 76.2 ± 13.4                 |
| <i>p</i>                          | 0.780*          | 0.944**                     | <b>0.042**</b> | 0.912*      | 0.441**    | 0.395*                      |
| <b>Rounds 1–3<sub>total</sub></b> |                 |                             |                |             |            |                             |
| Customary diet                    | 61.7 ± 15.6     | 57.6 ± 9.0                  | 46.5 ± 9.9     | 48.1 ± 11.6 | 33.5 ± 4.5 | -                           |
| Ketogenic diet                    | 61.6 ± 14.9     | 57.6 ± 7.8                  | 50.4 ± 7.8     | 51.5 ± 14.3 | 34.4 ± 4.3 | -                           |
| <i>p</i>                          | 1.000**         | 1.000*                      | <b>0.014*</b>  | 0.110**     | 0.373*     | -                           |
| <b>Males</b>                      |                 |                             |                |             |            |                             |
| <b>Round 1</b>                    |                 |                             |                |             |            |                             |
| Customary diet                    | 27.0 ± 2.9      | 21.0 ± 3.0                  | 16.4 ± 1.7     | 17.0 ± 4.0  | 14.2 ± 1.3 | 95.6 ± 9.2                  |
| Ketogenic diet                    | 25.2 ± 4.0      | 21.2 ± 1.6                  | 16.4 ± 1.3     | 17.2 ± 4.1  | 14.6 ± 1.9 | 94.6 ± 8.4                  |
| <i>p</i>                          | 0.285**         | 1.000**                     | 1.000**        | 0.686**     | 0.423**    | 1.000**                     |
| <b>Round 2</b>                    |                 |                             |                |             |            |                             |
| Customary diet                    | 20.8 ± 4.0      | 17.2 ± 4.3                  | 14.4 ± 2.9     | 13.6 ± 5.7  | 13.4 ± 2.1 | 79.4 ± 17.0                 |
| Ketogenic diet                    | 19.6 ± 2.1      | 16.6 ± 2.1                  | 14.4 ± 2.4     | 14.8 ± 4.3  | 12.6 ± 1.1 | 78.0 ± 9.5                  |
| <i>p</i>                          | 0.686**         | 0.686**                     | 1.000**        | 0.787**     | 0.361**    | 0.787**                     |
| <b>Round 3</b>                    |                 |                             |                |             |            |                             |
| Customary diet                    | 19.0 ± 5.2      | 14.4 ± 3.5                  | 14.2 ± 3.8     | 12.2 ± 5.5  | 12.4 ± 4.7 | 72.2 ± 20.4                 |
| Ketogenic diet                    | 16.2 ± 2.4      | 14.2 ± 3.3                  | 13.0 ± 3.4     | 13.4 ± 4.3  | 12.0 ± 3.2 | 68.8 ± 13.8                 |
| <i>p</i>                          | 0.144**         | 0.655**                     | 0.180**        | 0.500**     | 0.593**    | 0.225**                     |
| <b>Rounds 1–3<sub>total</sub></b> |                 |                             |                |             |            |                             |
| Customary diet                    | 66.8 ± 9.8      | 52.6 ± 10.5                 | 45.0 ± 8.0     | 42.8 ± 15.0 | 40.0 ± 6.3 | -                           |
| Ketogenic diet                    | 61.0 ± 6.0      | 52.0 ± 6.7                  | 43.8 ± 6.6     | 45.4 ± 12.3 | 39.2 ± 5.3 | -                           |
| <i>p</i>                          | 0.418**         | 0.787**                     | 0.465**        | 0.715**     | 0.423**    | -                           |

Note: Values are expressed as the mean ± standard deviation. \* Data were analysed by repeated-measured one-way analysis of variance. \*\* Data were analysed by the Wilcoxon signed-rank test. Statistical significance was set at  $p < 0.05$ .
