# Supplementary material for: Is a Four-Week Ketogenic Diet an Effective Nutritional Strategy in CrossFit-Trained Female and Male Athletes?
Source: MDPI journal article supplement (doi:10.3390/nu13030864), 2021-03-06
Supplement: s1 [file s1]

**Table S1.** Detailed nutritional value of customary and ketogenic diets.

|                                                       |                | Females      | Males       |
|-------------------------------------------------------|----------------|--------------|-------------|
| Energy (kcal·day <sup>-1</sup> )                      | Customary diet | 2485 ± 279   | 2645 ± 289  |
|                                                       | Ketogenic diet | 2659 ± 273   | 2955 ± 265  |
| Protein (g·day <sup>-1</sup> )                        | Customary diet | 109 ± 26     | 127 ± 15    |
|                                                       | Ketogenic diet | 115 ± 17     | 134 ± 9     |
| Protein (g·kg <sup>BM</sup> ·day <sup>-1</sup> )      | Customary diet | 1.8 ± 0.4    | 1.6 ± 0.2   |
|                                                       | Ketogenic diet | 1.9 ± 0.2    | 1.7 ± 0.2   |
| Protein (% energy intake)                             | Customary diet | 17.7 ± 4.5   | 19.4 ± 3.0  |
|                                                       | Ketogenic diet | 17.3 ± 1.7   | 18.4 ± 2.8  |
| Fat (g·day <sup>-1</sup> )                            | Customary diet | 101 ± 19     | 107 ± 29    |
|                                                       | Ketogenic diet | 230 ± 24*    | 245 ± 29*   |
| Fat (g·kg <sup>BM</sup> ·day <sup>-1</sup> )          | Customary diet | 1.7 ± 0.4    | 1.3 ± 0.3   |
|                                                       | Ketogenic diet | 3.8 ± 0.5*   | 3.2 ± 0.6*  |
| Fat (% energy intake)                                 | Customary diet | 36.9 ± 7.1   | 36.4 ± 8.1  |
|                                                       | Ketogenic diet | 77.8 ± 1.7*  | 77.0 ± 2.4* |
| Carbohydrate (g·day <sup>-1</sup> )                   | Customary diet | 285 ± 79     | 294 ± 80    |
|                                                       | Ketogenic diet | 33 ± 3*      | 33 ± 5*     |
| Carbohydrate (g·kg <sup>BM</sup> ·day <sup>-1</sup> ) | Customary diet | 4.7 ± 1.5    | 3.6 ± 0.9   |
|                                                       | Ketogenic diet | 0.5 ± 0.1*   | 0.4 ± 0.1*  |
| Carbohydrate (% energy intake)                        | Customary diet | 45.4 ± 10.5  | 44.2 ± 9.5  |
|                                                       | Ketogenic diet | 4.9 ± 0.4*   | 4.5 ± 0.5*  |
| Dietary fiber (g·day <sup>-1</sup> )                  | Customary diet | 32.8 ± 11.0  | 34.7 ± 6.9  |
|                                                       | Ketogenic diet | 9.9 ± 2.2*   | 8.9 ± 1.6*  |
| Cholesterol (mg·day <sup>-1</sup> )                   | Customary diet | 491 ± 292    | 497 ± 318   |
|                                                       | Ketogenic diet | 670 ± 509    | 637 ± 282   |
| Sucrose (g·day <sup>-1</sup> )                        | Customary diet | 43.2 ± 10.5  | 37.3 ± 11.2 |
|                                                       | Ketogenic diet | 2.3 ± 0.9*   | 2.0 ± 1.1*  |
| Ca (mg·day <sup>-1</sup> )                            | Customary diet | 810 ± 387    | 866 ± 406   |
|                                                       | Ketogenic diet | 1067 ± 232   | 1294 ± 450* |
| Fe (mg·day <sup>-1</sup> )                            | Customary diet | 13.4 ± 2.2   | 13.8 ± 1.8  |
|                                                       | Ketogenic diet | 14.1 ± 2.8   | 15.8 ± 4.9  |
| Na (mg·day <sup>-1</sup> )                            | Customary diet | 1646 ± 556   | 1457 ± 873  |
|                                                       | Ketogenic diet | 1796 ± 539   | 2118 ± 826  |
| K (mg·day <sup>-1</sup> )                             | Customary diet | 3297 ± 1300  | 3678 ± 1311 |
|                                                       | Ketogenic diet | 2883 ± 536   | 2959 ± 518  |
| P (mg·day <sup>-1</sup> )                             | Customary diet | 1248 ± 408   | 1674 ± 425  |
|                                                       | Ketogenic diet | 1769 ± 539*  | 1981 ± 383  |
| Mg (mg·day <sup>-1</sup> )                            | Customary diet | 345 ± 93     | 435 ± 187   |
|                                                       | Ketogenic diet | 245 ± 49*    | 249 ± 58*   |
| Zn (mg·day <sup>-1</sup> )                            | Customary diet | 9.4 ± 1.9    | 10.7 ± 2.1  |
|                                                       | Ketogenic diet | 14.2 ± 2.9*  | 15.8 ± 3.5* |
| Vitamin A (μg·day <sup>-1</sup> )                     | Customary diet | 1631 ± 863   | 1386 ± 1047 |
|                                                       | Ketogenic diet | 2268 ± 716   | 2486 ± 745* |
| Thiamine (mg·day <sup>-1</sup> )                      | Customary diet | 0.6 ± 0.2    | 0.9 ± 0.4   |
|                                                       | Ketogenic diet | 1.6 ± 0.7*   | 1.5 ± 0.6*  |
| Riboflavin (mg·day <sup>-1</sup> )                    | Customary diet | 1.2 ± 0.4    | 1.4 ± 0.6   |
|                                                       | Ketogenic diet | 2.5 ± 0.4**  | 3.1 ± 0.7*  |
| Vitamin C (mg·day <sup>-1</sup> )                     | Customary diet | 110 ± 27     | 207 ± 352   |
|                                                       | Ketogenic diet | 178 ± 75*    | 229 ± 86    |
| Vitamin D (μg·day <sup>-1</sup> )                     | Customary diet | 9.3 ± 4.2    | 9.7 ± 6.0   |
|                                                       | Ketogenic diet | 17.6 ± 9.5*  | 17.6 ± 12.3 |
| Vitamin E (mg·day <sup>-1</sup> )                     | Customary diet | 16.8 ± 13.2  | 20.4 ± 12.5 |
|                                                       | Ketogenic diet | 29.5 ± 13.6* | 29.6 ± 12.2 |
| Niacin (mg·day <sup>-1</sup> )                        | Customary diet | 23.5 ± 12.1  | 27.3 ± 10.5 |
|                                                       | Ketogenic diet | 23.0 ± 8.7   | 31.8 ± 9.3  |
| Pyridoxine (mg·day <sup>-1</sup> )                    | Customary diet | 2.6 ± 0.5    | 2.8 ± 1.2   |
|                                                       | Ketogenic diet | 2.4 ± 0.9    | 2.7 ± 0.9   |
| Folate (μg·day <sup>-1</sup> )                        | Customary diet | 252 ± 83     | 249 ± 106   |
|                                                       | Ketogenic diet | 637 ± 200*   | 628 ± 117*  |
| Cyanocobalamin (μg·day <sup>-1</sup> )                | Customary diet | 0.7 ± 0.2    | 0.7 ± 0.2   |
|                                                       | Ketogenic diet | 11.7 ± 6.8*  | 11.9 ± 3.0* |

Values are expressed as means ± SD. \* significantly different from customary diet ( $p < 0.05$ )
